# Supplementary material for: Unraveling the effect of ZrO2modifiers on the nature of active sites on AuRu/ZrO2catalysts for furfural hydrogenation
Source: Royal Society of Chemistry journal article supplement (doi:10.1039/c9se00847k), 2019-12-16
Supplement: c9se00847k1.pdf [file c9se00847k1.pdf]

**Unraveling the effect of ZrO<sub>2</sub> modifiers on the nature of active sites on AuRu/ZrO<sub>2</sub> catalysts  
for furfural hydrogenation**

Sara Morandi<sup>1</sup>, Maela Manzoli,<sup>\*,2</sup> Carine E. Chan-Thaw,<sup>3</sup> Barbara Bonelli<sup>4</sup>, Marta Stucchi,<sup>3</sup> Laura Prati,<sup>3</sup> Heike Störmer,<sup>5</sup> Wu Wang,<sup>6</sup> Di Wang,<sup>6,7</sup> Michael Pabel,<sup>8</sup> Alberto Villa<sup>\*,3</sup>

<sup>1</sup> *Dipartimento di Chimica and NIS – Interdepartmental Centre for Nanostructured Interfaces and Surfaces, Università degli Studi di Torino, Via P. Giuria 7, 10125 Torino, Italy.*

<sup>2</sup> *Dipartimento di Scienza e Tecnologia del Farmaco and NIS – Interdepartmental Centre for Nanostructured Interfaces and Surfaces, Università degli Studi di Torino, Via P. Giuria 9, 10125 Torino, Italy.*

<sup>3</sup> *Dipartimento di Chimica, Università degli Studi di Milano, via Golgi 19, I-20133 Milano, Italy*

<sup>4</sup> *Department of Applied Science and Technology and INSTM Unit of Torino Politecnico, Corso Duca degli Abruzzi 24, I-10129 Torino, Italy*

<sup>5</sup> *Laboratory for Electron Microscopy, Karlsruhe Institute of Technology, D-76128 Karlsruhe, Germany.*

<sup>6</sup> *Institute of Nanotechnology and* <sup>7</sup> *Karlsruhe Nano Micro Facility, Karlsruhe Institute of Technology, Hermann-von-Helmholtz-Platz 1, D-76344 Eggenstein-Leopoldshafen, Germany.*

<sup>8</sup> *Saint-Gobain NorPro A Division of Saint-Gobain Ceramic Materials GmbH Am Bahnhof D-56414 Steinefrenz Germany.*

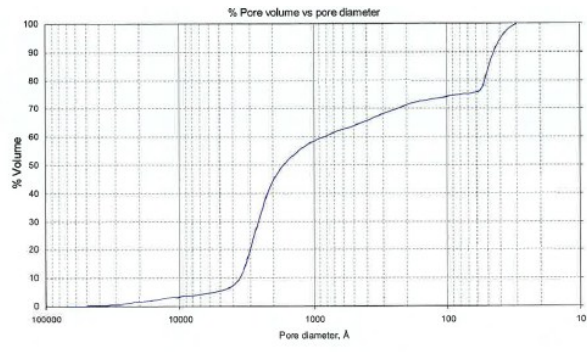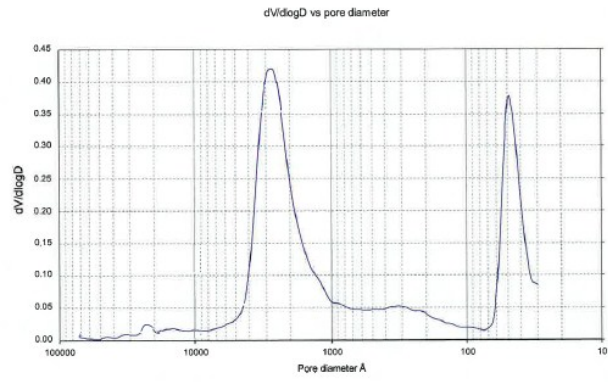

a)

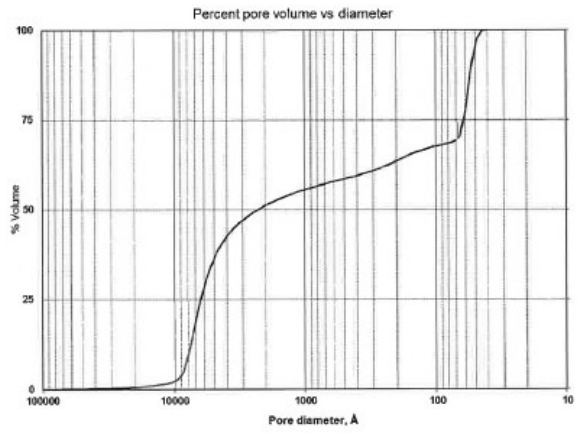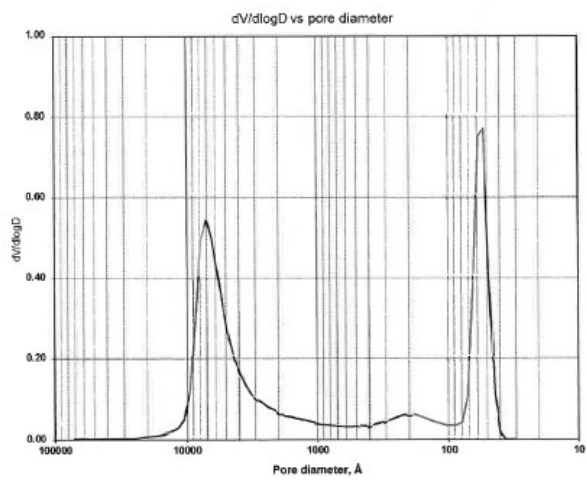

b)

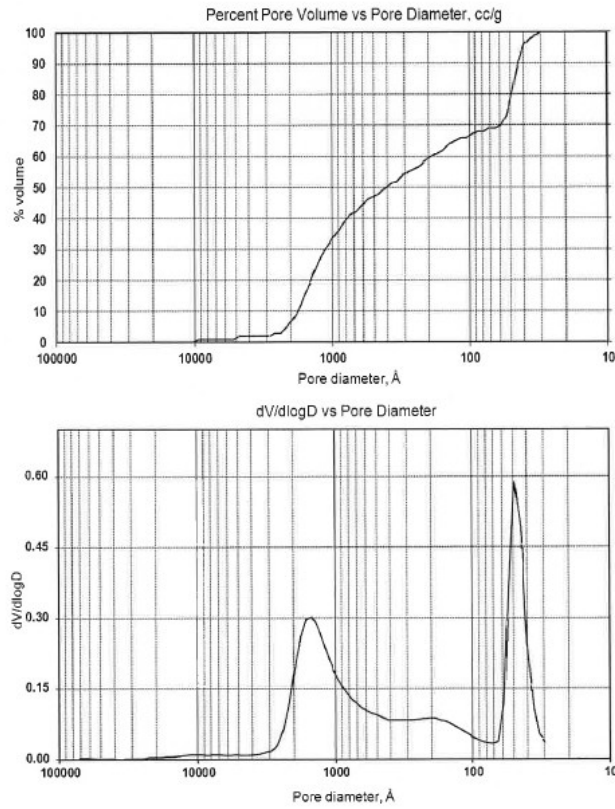

c)

Figure SI-1. Pore size distributions and pore volumes for a) ZrO<sub>2</sub>, b) Y-ZrO<sub>2</sub> and c) La-ZrO<sub>2</sub>.

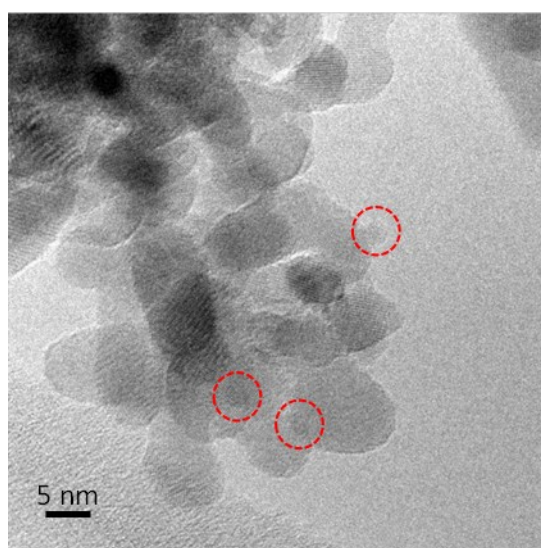

Figure SI-2. HRTEM image of the Ru/ZrO<sub>2</sub> catalyst, where the Ru nanoparticles are highlighted by circles

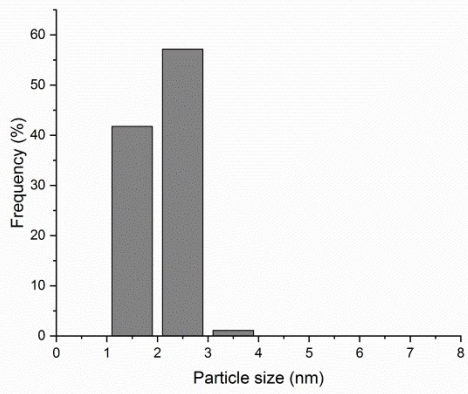

a)

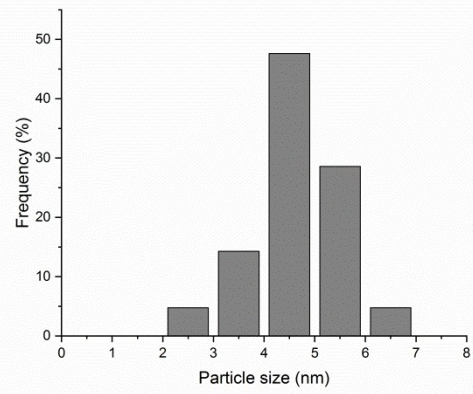

b)

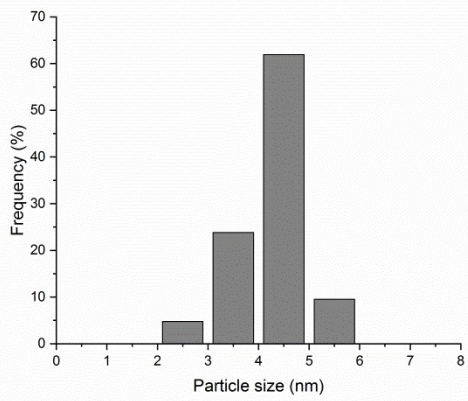

c)

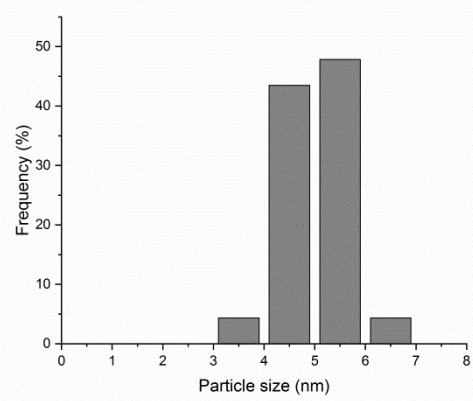

d)

Figure SI-3 Particle size distribution for a) Ru/ZrO<sub>2</sub>, b) AuRu/ZrO<sub>2</sub>, c) AuRu/Y-ZrO<sub>2</sub> and d) AuRu/La-ZrO<sub>2</sub>

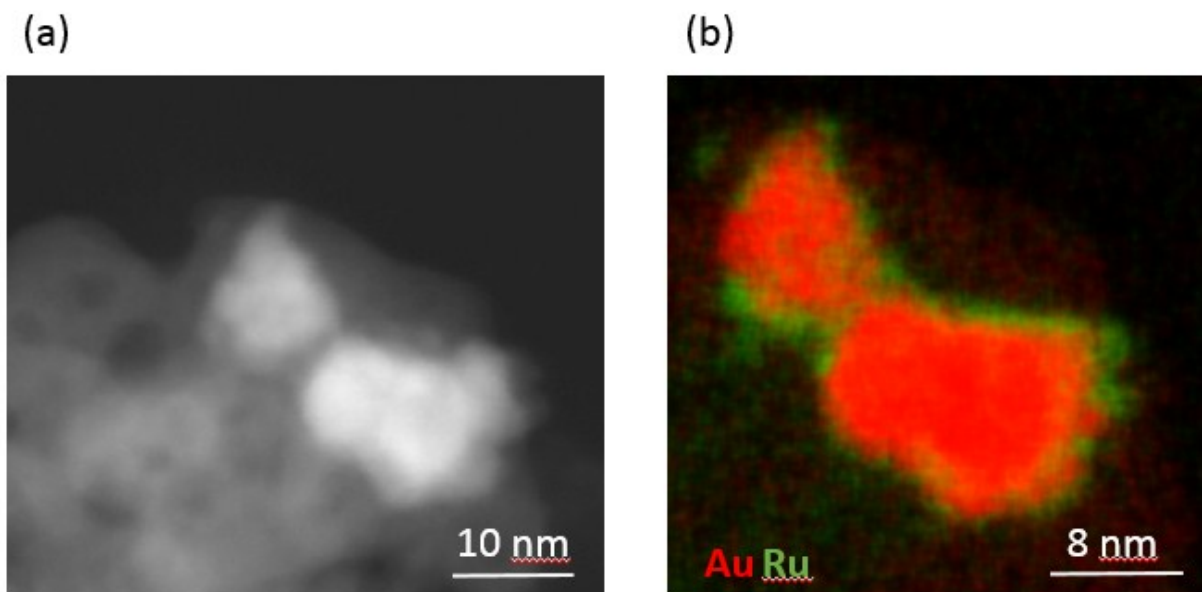

Figure SI-4. HAADF-STEM image of the AuRu/Y-ZrO<sub>2</sub> sample (section a) and quantified EDXS mapping (section b, Au,(red and Ru,green), showing the Ru NPs sitting on top of the Au NP.

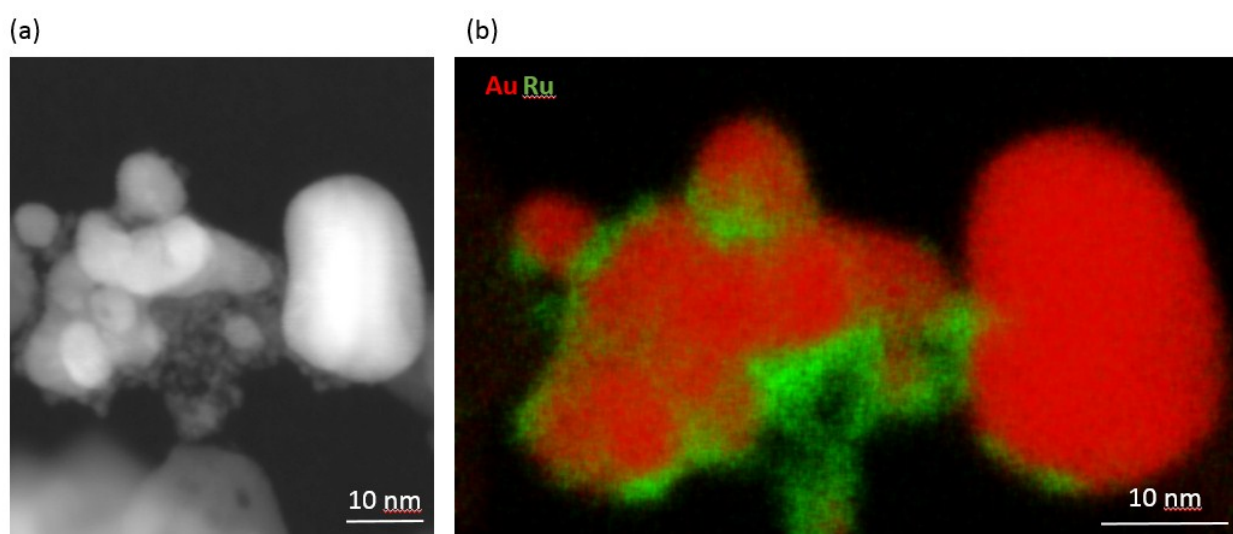

Figure SI-5. HAADF-STEM image of the AuRu/La-ZrO<sub>2</sub> sample (section a) and quantified EDXS mapping (section b, Au,(red and Ru,green), showing the Ru NPs sitting on top of the Au NP.

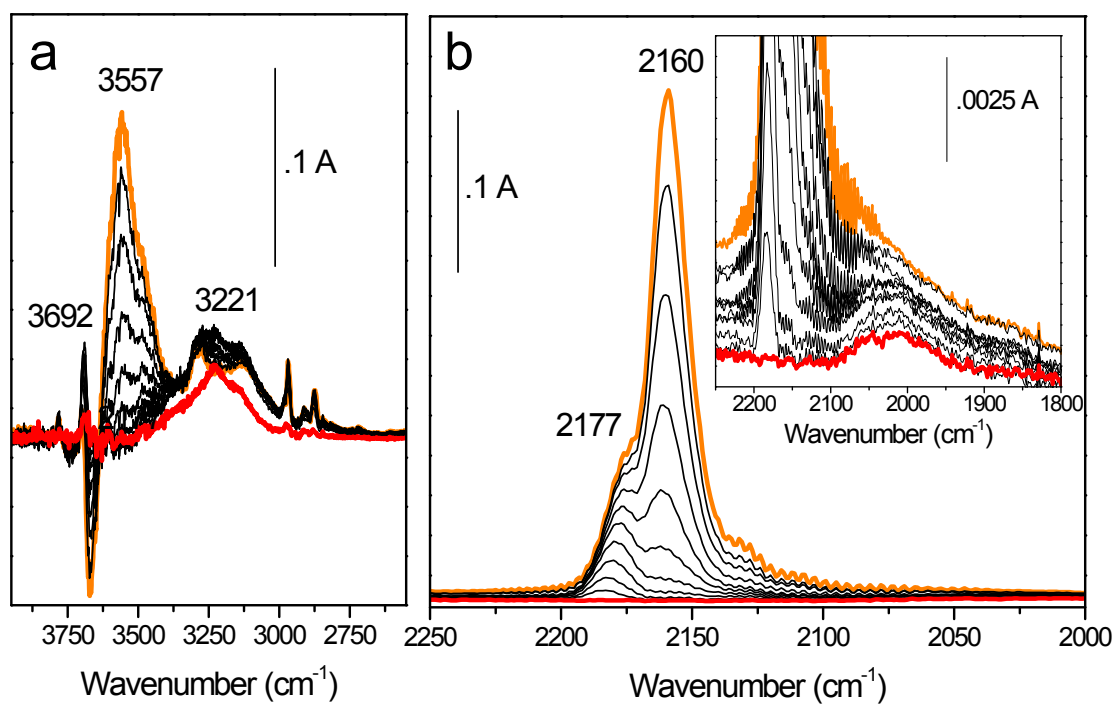

Figure SI-6. FTIR difference spectra collected on the Ru/ZrO<sub>2</sub> catalyst upon the inlet of 4 mbar CO at LNT (orange curve) and at decreasing CO pressures (black curves up to the red one) in the OH stretching region (section a) and in the carbonylic region (section b). Inset: zoom on the component at 2000-2050  $\text{cm}^{-1}$ .
